# Supplementary material for: Substrate type and light intensity determine lampenflora concentration on paleontological remains in show caves
Source: PeerJ. 2025 Aug 12;13:e19622. doi: 10.7717/peerj.19622 (PMC12356184; doi:10.7717/peerj.19622)
Supplement: Supplemental Information 1 [file peerj-13-19622-s001.xlsx]

## Sheet: Mediane
Sample_ID	Area	Substrate	Lux	Microorganism	Value
1	L1	Soil	2.41	cyano	0.09
1	L1	Soil	2.41	diatoms	0.1
1	L1	Soil	2.41	green	0
2	L1	Soil	3.24	cyano	0.03
2	L1	Soil	3.24	diatoms	0.11
2	L1	Soil	3.24	green	0
3	L1	Soil	13.09	cyano	0.02
3	L1	Soil	13.09	diatoms	0.12
3	L1	Soil	13.09	green	0
4	L1	Bone	10.75	cyano	0.05
4	L1	Bone	10.75	diatoms	0.18
4	L1	Bone	10.75	green	0
5	L1	Rock	13.5	cyano	0.01
5	L1	Rock	13.5	diatoms	0.06
5	L1	Rock	13.5	green	0
6	L2	Soil	0.79	cyano	0.03
6	L2	Soil	0.79	diatoms	0.11
6	L2	Soil	0.79	green	0
7	L2	Soil	3.22	cyano	0.03
7	L2	Soil	3.22	diatoms	0.09
7	L2	Soil	3.22	green	0
8	L2	Soil	3.94	cyano	0.04
8	L2	Soil	3.94	diatoms	0.14
8	L2	Soil	3.94	green	0
9	L2	Rock	4.35	cyano	0.01
9	L2	Rock	4.35	diatoms	0.08
9	L2	Rock	4.35	green	0
10	L3	Soil	0.87	cyano	0.14
10	L3	Soil	0.87	diatoms	0.11
10	L3	Soil	0.87	green	0
11	L3	Bone/Soil	1.57	cyano	0.09
11	L3	Bone/Soil	1.57	diatoms	0.25
11	L3	Bone/Soil	1.57	green	0
12	L3	Rock	0.4	cyano	0.01
12	L3	Rock	0.4	diatoms	0.11
12	L3	Rock	0.4	green	0
13	L3	Bone	0.73	cyano	0.04
13	L3	Bone	0.73	diatoms	0.15
13	L3	Bone	0.73	green	0
14	L5	Soil	0.7	cyano	0.05
14	L5	Soil	0.7	diatoms	0.16
14	L5	Soil	0.7	green	0
15	L5	Rock	0.91	cyano	0.02
15	L5	Rock	0.91	diatoms	0.17
15	L5	Rock	0.91	green	0
16	L5	Bone	0.48	cyano	0.04
16	L5	Bone	0.48	diatoms	0.27
16	L5	Bone	0.48	green	0
17	L4	Rock	0.87	cyano	0.04
17	L4	Rock	0.87	diatoms	0.15
17	L4	Rock	0.87	green	0
18	L4	Soil	0.37	cyano	0.03
18	L4	Soil	0.37	diatoms	0.09
18	L4	Soil	0.37	green	0
19	L4	Bone	0.44	cyano	0.01
19	L4	Bone	0.44	diatoms	0.21
19	L4	Bone	0.44	green	0
20	L4	Rock	0.41	cyano	0
20	L4	Rock	0.41	diatoms	0.05
20	L4	Rock	0.41	green	0
21	L6	Rock	2.21	cyano	0.03
21	L6	Rock	2.21	diatoms	0.09
21	L6	Rock	2.21	green	0
22	L6	Rock	9.24	cyano	0.02
22	L6	Rock	9.24	diatoms	0.11
22	L6	Rock	9.24	green	0
23	L6	Bone	1.28	cyano	0.07
23	L6	Bone	1.28	diatoms	0.34
23	L6	Bone	1.28	green	0
24	L6	Soil	1.46	cyano	0.06
24	L6	Soil	1.46	diatoms	0.14
24	L6	Soil	1.46	green	0
25	L6	Bone	1.06	cyano	0.05
25	L6	Bone	1.06	diatoms	0.22
25	L6	Bone	1.06	green	0
26	L7	Rock	45.55	cyano	1.17
26	L7	Rock	45.55	diatoms	1.2
26	L7	Rock	45.55	green	3.05
27	L7	Rock	27.06	cyano	0.49
27	L7	Rock	27.06	diatoms	0.32
27	L7	Rock	27.06	green	0.74
28	L7	Bone	15.76	cyano	0.12
28	L7	Bone	15.76	diatoms	0.22
28	L7	Bone	15.76	green	0
29	L7	Soil	9.6	cyano	0.01
29	L7	Soil	9.6	diatoms	0.05
29	L7	Soil	9.6	green	0.01
30	L8	Rock	9.44	cyano	0.09
30	L8	Rock	9.44	diatoms	0.21
30	L8	Rock	9.44	green	0.01
31	L8	Bone	39.5	cyano	0.35
31	L8	Bone	39.5	diatoms	0.56
31	L8	Bone	39.5	green	0
32	L8	Bone	91.33	cyano	0.86
32	L8	Bone	91.33	diatoms	0.6
32	L8	Bone	91.33	green	0.62
33	L8	Bone	71.91	cyano	0.28
33	L8	Bone	71.91	diatoms	0.64
33	L8	Bone	71.91	green	0
34	L8	Bone	63.21	cyano	0.66
34	L8	Bone	63.21	diatoms	0.42
34	L8	Bone	63.21	green	0.9
35	L8	Bone	37.66	cyano	0.37
35	L8	Bone	37.66	diatoms	0.51
35	L8	Bone	37.66	green	0
36	L8	Rock	27.75	cyano	1
36	L8	Rock	27.75	diatoms	1.32
36	L8	Rock	27.75	green	3.59
37	L9	Soil	3.6	cyano	0.05
37	L9	Soil	3.6	diatoms	0.11
37	L9	Soil	3.6	green	0.03
38	L9	Bone	6.79	cyano	0.14
38	L9	Bone	6.79	diatoms	0.37
38	L9	Bone	6.79	green	0
39	L9	Rock	6.25	cyano	0.04
39	L9	Rock	6.25	diatoms	0.14
39	L9	Rock	6.25	green	0
40	L9	Rock	12.98	cyano	0.68
40	L9	Rock	12.98	diatoms	0.61
40	L9	Rock	12.98	green	0.66
41	L9	Bone	15.7	cyano	0.12
41	L9	Bone	15.7	diatoms	0.27
41	L9	Bone	15.7	green	0
42	L8	Bone	35	cyano	0.2
42	L8	Bone	35	diatoms	0.36
42	L8	Bone	35	green	0
43	L8	Bone	31.17	cyano	0.18
43	L8	Bone	31.17	diatoms	0.36
43	L8	Bone	31.17	green	0
44	L8	Rock	63.69	cyano	0.37
44	L8	Rock	63.69	diatoms	0.32
44	L8	Rock	63.69	green	1.43
45	L10	Soil	4.67	cyano	0.15
45	L10	Soil	4.67	diatoms	0.19
45	L10	Soil	4.67	green	0
46	L10	Bone	7.07	cyano	0.23
46	L10	Bone	7.07	diatoms	0.39
46	L10	Bone	7.07	green	0
47	L10	Rock	10.36	cyano	0.14
47	L10	Rock	10.36	diatoms	0.21
47	L10	Rock	10.36	green	0
48	L10	Soil	11.22	cyano	0.09
48	L10	Soil	11.22	diatoms	0.21
48	L10	Soil	11.22	green	0.02
49	L10	Bone	14.47	cyano	0.26
49	L10	Bone	14.47	diatoms	0.44
49	L10	Bone	14.47	green	0.07
50	L11	Soil	24.44	cyano	0.04
50	L11	Soil	24.44	diatoms	0.13
50	L11	Soil	24.44	green	0.01
51	L11	Bone	21.16	cyano	0.09
51	L11	Bone	21.16	diatoms	0.32
51	L11	Bone	21.16	green	0
52	L11	Rock	26.82	cyano	0.06
52	L11	Rock	26.82	diatoms	0.19
52	L11	Rock	26.82	green	0
53	L11	Bone	14.72	cyano	0.19
53	L11	Bone	14.72	diatoms	0.31
53	L11	Bone	14.72	green	0
54	L11	Rock	18.74	cyano	0.02
54	L11	Rock	18.74	diatoms	0.07
54	L11	Rock	18.74	green	0
55	L11	Soil	15.35	cyano	0.07
55	L11	Soil	15.35	diatoms	0.24
55	L11	Soil	15.35	green	0
56	L12	Bone	9.85	cyano	0.11
56	L12	Bone	9.85	diatoms	0.26
56	L12	Bone	9.85	green	0
57	L12	Rock	2.68	cyano	0.03
57	L12	Rock	2.68	diatoms	0.11
57	L12	Rock	2.68	green	0
58	L12	Rock	5.76	cyano	0.01
58	L12	Rock	5.76	diatoms	0.11
58	L12	Rock	5.76	green	0
59	L12	Soil	8.43	cyano	0.05
59	L12	Soil	8.43	diatoms	0.22
59	L12	Soil	8.43	green	0
60	L12	Bone	12.28	cyano	0.18
60	L12	Bone	12.28	diatoms	0.49
60	L12	Bone	12.28	green	0

## Sheet: Repliche
Sample_ID	Area	Substrate	Lux	Microorganism	Replicate	Value
1	L1	Soil	2.41	cyano	1	0.03
1	L1	Soil	2.41	diatoms	1	0.09
1	L1	Soil	2.41	green	1	0
1	L1	Soil	2.41	cyano	2	0.09
1	L1	Soil	2.41	diatoms	2	0.1
1	L1	Soil	2.41	green	2	0
1	L1	Soil	2.41	cyano	3	0.16
1	L1	Soil	2.41	diatoms	3	0.14
1	L1	Soil	2.41	green	3	0
2	L1	Soil	3.24	cyano	1	0.02
2	L1	Soil	3.24	diatoms	1	0.11
2	L1	Soil	3.24	green	1	0
2	L1	Soil	3.24	cyano	2	0.04
2	L1	Soil	3.24	diatoms	2	0.11
2	L1	Soil	3.24	green	2	0
2	L1	Soil	3.24	cyano	3	0.03
2	L1	Soil	3.24	diatoms	3	0.12
2	L1	Soil	3.24	green	3	0
3	L1	Soil	13.09	cyano	1	0.02
3	L1	Soil	13.09	diatoms	1	0.12
3	L1	Soil	13.09	green	1	0
3	L1	Soil	13.09	cyano	2	0.02
3	L1	Soil	13.09	diatoms	2	0.12
3	L1	Soil	13.09	green	2	0
3	L1	Soil	13.09	cyano	3	0.03
3	L1	Soil	13.09	diatoms	3	0.12
3	L1	Soil	13.09	green	3	0
4	L1	Bone	10.75	cyano	1	0.03
4	L1	Bone	10.75	diatoms	1	0.15
4	L1	Bone	10.75	green	1	0
4	L1	Bone	10.75	cyano	2	0.05
4	L1	Bone	10.75	diatoms	2	0.2
4	L1	Bone	10.75	green	2	0
4	L1	Bone	10.75	cyano	3	0.05
4	L1	Bone	10.75	diatoms	3	0.18
4	L1	Bone	10.75	green	3	0
5	L1	Rock	13.5	cyano	1	0.01
5	L1	Rock	13.5	diatoms	1	0.06
5	L1	Rock	13.5	green	1	0
5	L1	Rock	13.5	cyano	2	0.01
5	L1	Rock	13.5	diatoms	2	0.06
5	L1	Rock	13.5	green	2	0
5	L1	Rock	13.5	cyano	3	0.01
5	L1	Rock	13.5	diatoms	3	0.06
5	L1	Rock	13.5	green	3	0
6	L2	Soil	0.79	cyano	1	0.03
6	L2	Soil	0.79	diatoms	1	0.11
6	L2	Soil	0.79	green	1	0
6	L2	Soil	0.79	cyano	2	0.02
6	L2	Soil	0.79	diatoms	2	0.1
6	L2	Soil	0.79	green	2	0
6	L2	Soil	0.79	cyano	3	0.05
6	L2	Soil	0.79	diatoms	3	0.15
6	L2	Soil	0.79	green	3	0
7	L2	Soil	3.22	cyano	1	0.03
7	L2	Soil	3.22	diatoms	1	0.09
7	L2	Soil	3.22	green	1	0
7	L2	Soil	3.22	cyano	2	0.02
7	L2	Soil	3.22	diatoms	2	0.09
7	L2	Soil	3.22	green	2	0
7	L2	Soil	3.22	cyano	3	0.05
7	L2	Soil	3.22	diatoms	3	0.1
7	L2	Soil	3.22	green	3	0
8	L2	Soil	3.94	cyano	1	0.02
8	L2	Soil	3.94	diatoms	1	0.14
8	L2	Soil	3.94	green	1	0
8	L2	Soil	3.94	cyano	2	0.05
8	L2	Soil	3.94	diatoms	2	0.11
8	L2	Soil	3.94	green	2	0
8	L2	Soil	3.94	cyano	3	0.04
8	L2	Soil	3.94	diatoms	3	0.14
8	L2	Soil	3.94	green	3	0
9	L2	Rock	4.35	cyano	1	0.01
9	L2	Rock	4.35	diatoms	1	0.06
9	L2	Rock	4.35	green	1	0
9	L2	Rock	4.35	cyano	2	0.02
9	L2	Rock	4.35	diatoms	2	0.08
9	L2	Rock	4.35	green	2	0
9	L2	Rock	4.35	cyano	3	0.01
9	L2	Rock	4.35	diatoms	3	0.12
9	L2	Rock	4.35	green	3	0
10	L3	Soil	0.87	cyano	1	0.06
10	L3	Soil	0.87	diatoms	1	0.1
10	L3	Soil	0.87	green	1	0
10	L3	Soil	0.87	cyano	2	0.14
10	L3	Soil	0.87	diatoms	2	0.11
10	L3	Soil	0.87	green	2	0
10	L3	Soil	0.87	cyano	3	0.18
10	L3	Soil	0.87	diatoms	3	0.12
10	L3	Soil	0.87	green	3	0
11	L3	Bone/Soil	1.57	cyano	1	0.06
11	L3	Bone/Soil	1.57	diatoms	1	0.19
11	L3	Bone/Soil	1.57	green	1	0
11	L3	Bone/Soil	1.57	cyano	2	0.09
11	L3	Bone/Soil	1.57	diatoms	2	0.28
11	L3	Bone/Soil	1.57	green	2	0
11	L3	Bone/Soil	1.57	cyano	3	0.14
11	L3	Bone/Soil	1.57	diatoms	3	0.25
11	L3	Bone/Soil	1.57	green	3	0
12	L3	Rock	0.4	cyano	1	0.02
12	L3	Rock	0.4	diatoms	1	0.11
12	L3	Rock	0.4	green	1	0
12	L3	Rock	0.4	cyano	2	0.01
12	L3	Rock	0.4	diatoms	2	0.1
12	L3	Rock	0.4	green	2	0
12	L3	Rock	0.4	cyano	3	0.01
12	L3	Rock	0.4	diatoms	3	0.11
12	L3	Rock	0.4	green	3	0
13	L3	Bone	0.73	cyano	1	0.02
13	L3	Bone	0.73	diatoms	1	0.1
13	L3	Bone	0.73	green	1	0
13	L3	Bone	0.73	cyano	2	0.08
13	L3	Bone	0.73	diatoms	2	0.17
13	L3	Bone	0.73	green	2	0
13	L3	Bone	0.73	cyano	3	0.04
13	L3	Bone	0.73	diatoms	3	0.15
13	L3	Bone	0.73	green	3	0
14	L5	Soil	0.7	cyano	1	0.06
14	L5	Soil	0.7	diatoms	1	0.2
14	L5	Soil	0.7	green	1	0
14	L5	Soil	0.7	cyano	2	0.05
14	L5	Soil	0.7	diatoms	2	0.12
14	L5	Soil	0.7	green	2	0
14	L5	Soil	0.7	cyano	3	0.05
14	L5	Soil	0.7	diatoms	3	0.16
14	L5	Soil	0.7	green	3	0
15	L5	Rock	0.91	cyano	1	0
15	L5	Rock	0.91	diatoms	1	0.18
15	L5	Rock	0.91	green	1	0
15	L5	Rock	0.91	cyano	2	0.02
15	L5	Rock	0.91	diatoms	2	0.17
15	L5	Rock	0.91	green	2	0
15	L5	Rock	0.91	cyano	3	0.02
15	L5	Rock	0.91	diatoms	3	0.14
15	L5	Rock	0.91	green	3	0
16	L5	Bone	0.48	cyano	1	0.07
16	L5	Bone	0.48	diatoms	1	0.28
16	L5	Bone	0.48	green	1	0
16	L5	Bone	0.48	cyano	2	0.04
16	L5	Bone	0.48	diatoms	2	0.13
16	L5	Bone	0.48	green	2	0
16	L5	Bone	0.48	cyano	3	0.04
16	L5	Bone	0.48	diatoms	3	0.27
16	L5	Bone	0.48	green	3	0
17	L4	Rock	0.87	cyano	1	0.03
17	L4	Rock	0.87	diatoms	1	0.11
17	L4	Rock	0.87	green	1	0
17	L4	Rock	0.87	cyano	2	0.05
17	L4	Rock	0.87	diatoms	2	0.15
17	L4	Rock	0.87	green	2	0
17	L4	Rock	0.87	cyano	3	0.04
17	L4	Rock	0.87	diatoms	3	0.15
17	L4	Rock	0.87	green	3	0
18	L4	Soil	0.37	cyano	1	0.03
18	L4	Soil	0.37	diatoms	1	0.14
18	L4	Soil	0.37	green	1	0
18	L4	Soil	0.37	cyano	2	0.03
18	L4	Soil	0.37	diatoms	2	0.09
18	L4	Soil	0.37	green	2	0
18	L4	Soil	0.37	cyano	3	0.02
18	L4	Soil	0.37	diatoms	3	0.08
18	L4	Soil	0.37	green	3	0
19	L4	Bone	0.44	cyano	1	0
19	L4	Bone	0.44	diatoms	1	0.16
19	L4	Bone	0.44	green	1	0
19	L4	Bone	0.44	cyano	2	0.01
19	L4	Bone	0.44	diatoms	2	0.27
19	L4	Bone	0.44	green	2	0
19	L4	Bone	0.44	cyano	3	0.06
19	L4	Bone	0.44	diatoms	3	0.21
19	L4	Bone	0.44	green	3	0
20	L4	Rock	0.41	cyano	1	0
20	L4	Rock	0.41	diatoms	1	0.05
20	L4	Rock	0.41	green	1	0
20	L4	Rock	0.41	cyano	2	0
20	L4	Rock	0.41	diatoms	2	0.03
20	L4	Rock	0.41	green	2	0
20	L4	Rock	0.41	cyano	3	0.03
20	L4	Rock	0.41	diatoms	3	0.1
20	L4	Rock	0.41	green	3	0
21	L6	Rock	2.21	cyano	1	0.03
21	L6	Rock	2.21	diatoms	1	0.08
21	L6	Rock	2.21	green	1	0
21	L6	Rock	2.21	cyano	2	0.11
21	L6	Rock	2.21	diatoms	2	0.15
21	L6	Rock	2.21	green	2	0.16
21	L6	Rock	2.21	cyano	3	0.02
21	L6	Rock	2.21	diatoms	3	0.09
21	L6	Rock	2.21	green	3	0
22	L6	Rock	9.24	cyano	1	0.04
22	L6	Rock	9.24	diatoms	1	0.11
22	L6	Rock	9.24	green	1	0
22	L6	Rock	9.24	cyano	2	0.02
22	L6	Rock	9.24	diatoms	2	0.06
22	L6	Rock	9.24	green	2	0
22	L6	Rock	9.24	cyano	3	0.02
22	L6	Rock	9.24	diatoms	3	0.13
22	L6	Rock	9.24	green	3	0
23	L6	Bone	1.28	cyano	1	0.06
23	L6	Bone	1.28	diatoms	1	0.3
23	L6	Bone	1.28	green	1	0
23	L6	Bone	1.28	cyano	2	0.08
23	L6	Bone	1.28	diatoms	2	0.34
23	L6	Bone	1.28	green	2	0
23	L6	Bone	1.28	cyano	3	0.07
23	L6	Bone	1.28	diatoms	3	0.34
23	L6	Bone	1.28	green	3	0
24	L6	Soil	1.46	cyano	1	0.03
24	L6	Soil	1.46	diatoms	1	0.14
24	L6	Soil	1.46	green	1	0
24	L6	Soil	1.46	cyano	2	0.06
24	L6	Soil	1.46	diatoms	2	0.1
24	L6	Soil	1.46	green	2	0.01
24	L6	Soil	1.46	cyano	3	0.07
24	L6	Soil	1.46	diatoms	3	0.18
24	L6	Soil	1.46	green	3	0
25	L6	Bone	1.06	cyano	1	0.08
25	L6	Bone	1.06	diatoms	1	0.23
25	L6	Bone	1.06	green	1	0
25	L6	Bone	1.06	cyano	2	0.04
25	L6	Bone	1.06	diatoms	2	0.22
25	L6	Bone	1.06	green	2	0
25	L6	Bone	1.06	cyano	3	0.05
25	L6	Bone	1.06	diatoms	3	0.2
25	L6	Bone	1.06	green	3	0
26	L7	Rock	45.55	cyano	1	1.01
26	L7	Rock	45.55	diatoms	1	0.99
26	L7	Rock	45.55	green	1	2.9
26	L7	Rock	45.55	cyano	2	1.24
26	L7	Rock	45.55	diatoms	2	1.6
26	L7	Rock	45.55	green	2	3.05
26	L7	Rock	45.55	cyano	3	1.17
26	L7	Rock	45.55	diatoms	3	1.2
26	L7	Rock	45.55	green	3	3.19
27	L7	Rock	27.06	cyano	1	0.49
27	L7	Rock	27.06	diatoms	1	0.32
27	L7	Rock	27.06	green	1	0.74
27	L7	Rock	27.06	cyano	2	0.29
27	L7	Rock	27.06	diatoms	2	0.21
27	L7	Rock	27.06	green	2	0.55
27	L7	Rock	27.06	cyano	3	0.55
27	L7	Rock	27.06	diatoms	3	0.48
27	L7	Rock	27.06	green	3	1.1
28	L7	Bone	15.76	cyano	1	0.12
28	L7	Bone	15.76	diatoms	1	0.22
28	L7	Bone	15.76	green	1	0
28	L7	Bone	15.76	cyano	2	0.09
28	L7	Bone	15.76	diatoms	2	0.19
28	L7	Bone	15.76	green	2	0
28	L7	Bone	15.76	cyano	3	0.18
28	L7	Bone	15.76	diatoms	3	0.33
28	L7	Bone	15.76	green	3	0
29	L7	Soil	9.6	cyano	1	0.01
29	L7	Soil	9.6	diatoms	1	0.05
29	L7	Soil	9.6	green	1	0.01
29	L7	Soil	9.6	cyano	2	0
29	L7	Soil	9.6	diatoms	2	0.04
29	L7	Soil	9.6	green	2	0.01
29	L7	Soil	9.6	cyano	3	0.01
29	L7	Soil	9.6	diatoms	3	0.06
29	L7	Soil	9.6	green	3	0
30	L8	Rock	9.44	cyano	1	0.29
30	L8	Rock	9.44	diatoms	1	0.31
30	L8	Rock	9.44	green	1	0.33
30	L8	Rock	9.44	cyano	2	0.06
30	L8	Rock	9.44	diatoms	2	0.15
30	L8	Rock	9.44	green	2	0.01
30	L8	Rock	9.44	cyano	3	0.09
30	L8	Rock	9.44	diatoms	3	0.21
30	L8	Rock	9.44	green	3	0
31	L8	Bone	39.5	cyano	1	0.35
31	L8	Bone	39.5	diatoms	1	0.57
31	L8	Bone	39.5	green	1	0.17
31	L8	Bone	39.5	cyano	2	0.18
31	L8	Bone	39.5	diatoms	2	0.36
31	L8	Bone	39.5	green	2	0
31	L8	Bone	39.5	cyano	3	0.37
31	L8	Bone	39.5	diatoms	3	0.56
31	L8	Bone	39.5	green	3	0
32	L8	Bone	91.33	cyano	1	0.86
32	L8	Bone	91.33	diatoms	1	0.39
32	L8	Bone	91.33	green	1	0.75
32	L8	Bone	91.33	cyano	2	1.2
32	L8	Bone	91.33	diatoms	2	0.6
32	L8	Bone	91.33	green	2	0.49
32	L8	Bone	91.33	cyano	3	0.43
32	L8	Bone	91.33	diatoms	3	0.72
32	L8	Bone	91.33	green	3	0.62
33	L8	Bone	71.91	cyano	1	0.37
33	L8	Bone	71.91	diatoms	1	0.98
33	L8	Bone	71.91	green	1	0.3
33	L8	Bone	71.91	cyano	2	0.28
33	L8	Bone	71.91	diatoms	2	0.64
33	L8	Bone	71.91	green	2	0
33	L8	Bone	71.91	cyano	3	0.16
33	L8	Bone	71.91	diatoms	3	0.38
33	L8	Bone	71.91	green	3	0
34	L8	Bone	63.21	cyano	1	0.4
34	L8	Bone	63.21	diatoms	1	0.42
34	L8	Bone	63.21	green	1	0.76
34	L8	Bone	63.21	cyano	2	0.86
34	L8	Bone	63.21	diatoms	2	0.71
34	L8	Bone	63.21	green	2	0.9
34	L8	Bone	63.21	cyano	3	0.66
34	L8	Bone	63.21	diatoms	3	0.35
34	L8	Bone	63.21	green	3	1.82
35	L8	Bone	37.66	cyano	1	0.37
35	L8	Bone	37.66	diatoms	1	0.43
35	L8	Bone	37.66	green	1	0.13
35	L8	Bone	37.66	cyano	2	0.3
35	L8	Bone	37.66	diatoms	2	0.51
35	L8	Bone	37.66	green	2	0
35	L8	Bone	37.66	cyano	3	0.41
35	L8	Bone	37.66	diatoms	3	0.56
35	L8	Bone	37.66	green	3	0
36	L8	Rock	27.75	cyano	1	1
36	L8	Rock	27.75	diatoms	1	1.32
36	L8	Rock	27.75	green	1	3.83
36	L8	Rock	27.75	cyano	2	0.34
36	L8	Rock	27.75	diatoms	2	0.48
36	L8	Rock	27.75	green	2	1.04
36	L8	Rock	27.75	cyano	3	1.2
36	L8	Rock	27.75	diatoms	3	1.52
36	L8	Rock	27.75	green	3	3.59
37	L9	Soil	3.6	cyano	1	0.05
37	L9	Soil	3.6	diatoms	1	0.1
37	L9	Soil	3.6	green	1	0.04
37	L9	Soil	3.6	cyano	2	0.05
37	L9	Soil	3.6	diatoms	2	0.11
37	L9	Soil	3.6	green	2	0.01
37	L9	Soil	3.6	cyano	3	0.07
37	L9	Soil	3.6	diatoms	3	0.13
37	L9	Soil	3.6	green	3	0.03
38	L9	Bone	6.79	cyano	1	0.12
38	L9	Bone	6.79	diatoms	1	0.4
38	L9	Bone	6.79	green	1	0
38	L9	Bone	6.79	cyano	2	0.14
38	L9	Bone	6.79	diatoms	2	0.37
38	L9	Bone	6.79	green	2	0
38	L9	Bone	6.79	cyano	3	0.17
38	L9	Bone	6.79	diatoms	3	0.32
38	L9	Bone	6.79	green	3	0
39	L9	Rock	6.25	cyano	1	0.03
39	L9	Rock	6.25	diatoms	1	0.13
39	L9	Rock	6.25	green	1	0
39	L9	Rock	6.25	cyano	2	0.04
39	L9	Rock	6.25	diatoms	2	0.14
39	L9	Rock	6.25	green	2	0
39	L9	Rock	6.25	cyano	3	0.07
39	L9	Rock	6.25	diatoms	3	0.18
39	L9	Rock	6.25	green	3	0
40	L9	Rock	12.98	cyano	1	0.52
40	L9	Rock	12.98	diatoms	1	0.38
40	L9	Rock	12.98	green	1	0.04
40	L9	Rock	12.98	cyano	2	0.68
40	L9	Rock	12.98	diatoms	2	0.66
40	L9	Rock	12.98	green	2	0.66
40	L9	Rock	12.98	cyano	3	1.01
40	L9	Rock	12.98	diatoms	3	0.61
40	L9	Rock	12.98	green	3	2.84
41	L9	Bone	15.7	cyano	1	0.12
41	L9	Bone	15.7	diatoms	1	0.27
41	L9	Bone	15.7	green	1	0
41	L9	Bone	15.7	cyano	2	0.11
41	L9	Bone	15.7	diatoms	2	0.27
41	L9	Bone	15.7	green	2	0
41	L9	Bone	15.7	cyano	3	0.21
41	L9	Bone	15.7	diatoms	3	0.34
41	L9	Bone	15.7	green	3	0.06
42	L8	Bone	35	cyano	1	0.16
42	L8	Bone	35	diatoms	1	0.31
42	L8	Bone	35	green	1	0
42	L8	Bone	35	cyano	2	0.24
42	L8	Bone	35	diatoms	2	0.4
42	L8	Bone	35	green	2	0
42	L8	Bone	35	cyano	3	0.2
42	L8	Bone	35	diatoms	3	0.36
42	L8	Bone	35	green	3	0
43	L8	Bone	31.17	cyano	1	0.2
43	L8	Bone	31.17	diatoms	1	0.36
43	L8	Bone	31.17	green	1	0
43	L8	Bone	31.17	cyano	2	0.18
43	L8	Bone	31.17	diatoms	2	0.38
43	L8	Bone	31.17	green	2	0
43	L8	Bone	31.17	cyano	3	0.11
43	L8	Bone	31.17	diatoms	3	0.3
43	L8	Bone	31.17	green	3	0
44	L8	Rock	63.69	cyano	1	0.17
44	L8	Rock	63.69	diatoms	1	0.32
44	L8	Rock	63.69	green	1	0
44	L8	Rock	63.69	cyano	2	0.62
44	L8	Rock	63.69	diatoms	2	0.81
44	L8	Rock	63.69	green	2	1.43
44	L8	Rock	63.69	cyano	3	0.37
44	L8	Rock	63.69	diatoms	3	0.32
44	L8	Rock	63.69	green	3	1.97
45	L10	Soil	4.67	cyano	1	0.15
45	L10	Soil	4.67	diatoms	1	0.23
45	L10	Soil	4.67	green	1	0
45	L10	Soil	4.67	cyano	2	0.09
45	L10	Soil	4.67	diatoms	2	0.19
45	L10	Soil	4.67	green	2	0
45	L10	Soil	4.67	cyano	3	0.18
45	L10	Soil	4.67	diatoms	3	0.19
45	L10	Soil	4.67	green	3	0
46	L10	Bone	7.07	cyano	1	0.65
46	L10	Bone	7.07	diatoms	1	0.63
46	L10	Bone	7.07	green	1	0.31
46	L10	Bone	7.07	cyano	2	0.21
46	L10	Bone	7.07	diatoms	2	0.39
46	L10	Bone	7.07	green	2	0
46	L10	Bone	7.07	cyano	3	0.23
46	L10	Bone	7.07	diatoms	3	0.35
46	L10	Bone	7.07	green	3	0
47	L10	Rock	10.36	cyano	1	0.14
47	L10	Rock	10.36	diatoms	1	0.18
47	L10	Rock	10.36	green	1	0.06
47	L10	Rock	10.36	cyano	2	0.08
47	L10	Rock	10.36	diatoms	2	0.24
47	L10	Rock	10.36	green	2	0
47	L10	Rock	10.36	cyano	3	0.18
47	L10	Rock	10.36	diatoms	3	0.21
47	L10	Rock	10.36	green	3	0
48	L10	Soil	11.22	cyano	1	0.09
48	L10	Soil	11.22	diatoms	1	0.21
48	L10	Soil	11.22	green	1	0.03
48	L10	Soil	11.22	cyano	2	0.04
48	L10	Soil	11.22	diatoms	2	0.12
48	L10	Soil	11.22	green	2	0
48	L10	Soil	11.22	cyano	3	0.17
48	L10	Soil	11.22	diatoms	3	0.23
48	L10	Soil	11.22	green	3	0.02
49	L10	Bone	14.47	cyano	1	0.16
49	L10	Bone	14.47	diatoms	1	0.43
49	L10	Bone	14.47	green	1	0.07
49	L10	Bone	14.47	cyano	2	0.42
49	L10	Bone	14.47	diatoms	2	0.5
49	L10	Bone	14.47	green	2	0.35
49	L10	Bone	14.47	cyano	3	0.26
49	L10	Bone	14.47	diatoms	3	0.44
49	L10	Bone	14.47	green	3	0.06
50	L11	Soil	24.44	cyano	1	0.04
50	L11	Soil	24.44	diatoms	1	0.11
50	L11	Soil	24.44	green	1	0
50	L11	Soil	24.44	cyano	2	0.04
50	L11	Soil	24.44	diatoms	2	0.15
50	L11	Soil	24.44	green	2	0.01
50	L11	Soil	24.44	cyano	3	0.12
50	L11	Soil	24.44	diatoms	3	0.13
50	L11	Soil	24.44	green	3	0.02
51	L11	Bone	21.16	cyano	1	0.09
51	L11	Bone	21.16	diatoms	1	0.32
51	L11	Bone	21.16	green	1	0
51	L11	Bone	21.16	cyano	2	0.14
51	L11	Bone	21.16	diatoms	2	0.31
51	L11	Bone	21.16	green	2	0
51	L11	Bone	21.16	cyano	3	0.09
51	L11	Bone	21.16	diatoms	3	0.33
51	L11	Bone	21.16	green	3	0
52	L11	Rock	26.82	cyano	1	0.06
52	L11	Rock	26.82	diatoms	1	0.12
52	L11	Rock	26.82	green	1	0
52	L11	Rock	26.82	cyano	2	0.07
52	L11	Rock	26.82	diatoms	2	0.19
52	L11	Rock	26.82	green	2	0
52	L11	Rock	26.82	cyano	3	0.06
52	L11	Rock	26.82	diatoms	3	0.22
52	L11	Rock	26.82	green	3	0
53	L11	Bone	14.72	cyano	1	0.09
53	L11	Bone	14.72	diatoms	1	0.24
53	L11	Bone	14.72	green	1	0
53	L11	Bone	14.72	cyano	2	0.25
53	L11	Bone	14.72	diatoms	2	0.35
53	L11	Bone	14.72	green	2	0
53	L11	Bone	14.72	cyano	3	0.19
53	L11	Bone	14.72	diatoms	3	0.31
53	L11	Bone	14.72	green	3	0
54	L11	Rock	18.74	cyano	1	0.02
54	L11	Rock	18.74	diatoms	1	0.06
54	L11	Rock	18.74	green	1	0
54	L11	Rock	18.74	cyano	2	0
54	L11	Rock	18.74	diatoms	2	0.07
54	L11	Rock	18.74	green	2	0
54	L11	Rock	18.74	cyano	3	0.05
54	L11	Rock	18.74	diatoms	3	0.19
54	L11	Rock	18.74	green	3	0
55	L11	Soil	15.35	cyano	1	0.06
55	L11	Soil	15.35	diatoms	1	0.24
55	L11	Soil	15.35	green	1	0
55	L11	Soil	15.35	cyano	2	0.07
55	L11	Soil	15.35	diatoms	2	0.24
55	L11	Soil	15.35	green	2	0
55	L11	Soil	15.35	cyano	3	0.07
55	L11	Soil	15.35	diatoms	3	0.21
55	L11	Soil	15.35	green	3	0
56	L12	Bone	9.85	cyano	1	0.09
56	L12	Bone	9.85	diatoms	1	0.26
56	L12	Bone	9.85	green	1	0
56	L12	Bone	9.85	cyano	2	0.14
56	L12	Bone	9.85	diatoms	2	0.31
56	L12	Bone	9.85	green	2	0
56	L12	Bone	9.85	cyano	3	0.11
56	L12	Bone	9.85	diatoms	3	0.23
56	L12	Bone	9.85	green	3	0
57	L12	Rock	2.68	cyano	1	0.03
57	L12	Rock	2.68	diatoms	1	0.11
57	L12	Rock	2.68	green	1	0
57	L12	Rock	2.68	cyano	2	0.06
57	L12	Rock	2.68	diatoms	2	0.13
57	L12	Rock	2.68	green	2	0
57	L12	Rock	2.68	cyano	3	0.02
57	L12	Rock	2.68	diatoms	3	0.1
57	L12	Rock	2.68	green	3	0
58	L12	Rock	5.76	cyano	1	0.03
58	L12	Rock	5.76	diatoms	1	0.3
58	L12	Rock	5.76	green	1	0.05
58	L12	Rock	5.76	cyano	2	0.01
58	L12	Rock	5.76	diatoms	2	0.11
58	L12	Rock	5.76	green	2	0
58	L12	Rock	5.76	cyano	3	0.01
58	L12	Rock	5.76	diatoms	3	0.09
58	L12	Rock	5.76	green	3	0
59	L12	Soil	8.43	cyano	1	0.08
59	L12	Soil	8.43	diatoms	1	0.24
59	L12	Soil	8.43	green	1	0
59	L12	Soil	8.43	cyano	2	0.05
59	L12	Soil	8.43	diatoms	2	0.19
59	L12	Soil	8.43	green	2	0
59	L12	Soil	8.43	cyano	3	0.05
59	L12	Soil	8.43	diatoms	3	0.22
59	L12	Soil	8.43	green	3	0
60	L12	Bone	12.28	cyano	1	0.22
60	L12	Bone	12.28	diatoms	1	0.49
60	L12	Bone	12.28	green	1	0
60	L12	Bone	12.28	cyano	2	0.18
60	L12	Bone	12.28	diatoms	2	0.41
60	L12	Bone	12.28	green	2	0
60	L12	Bone	12.28	cyano	3	0.18
60	L12	Bone	12.28	diatoms	3	0.69
60	L12	Bone	12.28	green	3	0
